# Supplementary material for: A Systematic Review of Shared Decision–Making Interventions for Service Users With Serious Mental Illnesses: State of the Science and Future Directions
Source: Atypon-hosted journal article supplement (doi:10.1176/appi.ps.202000429), 2021-08-09
Supplement: appi.ps.202000429.ds001.pdf [file appi.ps.202000429.ds001.pdf]

**File 1. Search Terms**

PubMed Legacy (NLM)

(((((((((schizo\*[tiab] OR early psychos\*[tiab] OR psychosis\*[tiab] AND psychoses\*[tiab] OR psychos\*[tiab] OR psychotic disorder\*[tiab] OR schizophrenia episode\*[tiab] OR "Schizophrenia, Paranoid"[Mesh] OR SMI[tiab] OR antipsychotic\*[tiab] OR "Schizophrenia Spectrum and Other Psychotic Disorders"[Mesh] OR "Schizophrenia"[Mesh] OR "Schizophrenia, Disorganized"[Mesh] OR "Schizophrenia, Catatonic"[Mesh] OR "Borderline Personality Disorder"[Mesh] OR major depressive disorder\*[tiab] OR Borderline personality disorder\*[tiab] OR Schizoaffective Disorder\*[tiab] OR severe mental disorder\*[tiab] OR serious mental disorder\*[tiab] OR serious mental ill\*[tiab] OR persistent mental ill\*[tiab] OR "bipolar disorder"[mesh] OR (chronic[tiab] AND mental[tiab]) OR (severe[tiab] AND mental[tiab]) OR (mental[tiab] AND disorder\*[tiab]) OR ("mood disorders"[mesh]))) AND (((share\* AND decis\*) OR decision aid\*[tiab] OR decision support tool\*[tiab] OR "decision support techniques"[MESH] OR (encounter[tiab] AND decision tool\*[tiab]) OR shared decision mak\*[tiab] OR shared decision\*[tiab] OR patient engage\*[tiab] OR patient involv\*[tiab] OR decision coach\*[tiab] OR (Coordinat\* AND decis\*) OR CSC[tiab] OR supported decision mak\*[tiab] OR "decision making"[mesh] OR (decision\* AND support\*) OR (decision\* AND mak\*)))))) AND (((severe\* OR serious\* OR first\* OR inital\* OR primar\* OR earl\* OR predict\* OR early psychos\*[tiab] OR first time\*[tiab] OR first episod\*[tiab]))) AND (English[lang])

Embase (Elsevier)

(psychoses\*:ti,ab OR 'psychotic'/exp OR 'psychotic disorder\*':ti,ab OR 'schizophrenia'/exp OR 'schizophrenia episode\*':ti,ab OR antipsychotic\*:ti,ab OR 'major depressive disorder\*':ti,ab OR 'borderline personality disorder\*':ti,ab OR 'schizoaffective disorder\*':ti,ab OR 'severe mental disorder\*':ti,ab OR 'serious mental disorder\*':ti,ab OR 'serious mental ill\*':ti,ab OR 'persistent mental ill\*':ti,ab OR 'paranoid schizophrenia'/exp OR 'paranoid schizophrenia':ti,ab OR 'psychosis'/exp OR 'hebephrenia'/exp OR 'hebephrenia':ti,ab OR 'catatonic schizophrenia'/exp OR 'catatonic schizophrenia':ti,ab OR 'borderline state'/exp OR 'borderline state':ti,ab OR 'bipolar disorder'/exp OR 'bipolar disorder\*':ti,ab OR 'mood disorder'/exp OR 'mood disorder\*':ti,ab OR 'chronic mental disorder\*':ti,ab) OR ((schizo\* NEAR/3 first):ti,ab) OR ((psychos\* NEAR/3 first):ti,ab) OR ((mental\* NEAR/3 first):ti,ab) OR ((schizo\* NEAR/3 early):ti,ab) OR ((psychos\* NEAR/3 early):ti,ab) OR ((mental\* NEAR/3 early):ti,ab) OR ((schizo\* NEAR/3 initial):ti,ab) OR ((psychos\* NEAR/3 initial):ti,ab) OR ((mental\* NEAR/3 initial):ti,ab) OR ((schizo\* NEAR/3 primary):ti,ab) OR ((psychos\* NEAR/3 primary):ti,ab) OR ((mental\* NEAR/3 primary):ti,ab) AND (decis\*:ti,ab OR (support\*:ti,ab AND coach\*:ti,ab) OR (coordinat\*:ti,ab AND decis\*:ti,ab) OR (support\*:ti,ab AND 'decision mak\*':ti,ab) OR 'decision making'/exp OR 'decision support system'/exp OR (decision\*:ti,ab AND support\*:ti,ab) OR (decision\*:ti,ab AND mak\*:ti,ab)) AND (severe\*:ti,ab OR serious\*:ti,ab OR major\*:ti,ab) AND (first\*:ti,ab OR inital\*:ti,ab OR primar\*:ti,ab OR earl\*:ti,ab OR predict\*:ti,ab OR 'first time\*':ti,ab OR 'first episod\*':ti,ab) AND [english]/lim

Web of Science (Clarivate Analytics)

TS=((schizo\* OR "early psychos\*" OR psychosis OR psychoses\* OR psychos\* OR psychot\* OR "psychotic disorder\*" OR "schizophrenia episode\*" OR smi OR antipsychotic\* OR "major depressive disorder\*" OR "borderline personality disorder\*" OR "schizoaffective disorder\*" OR "severe mental disorder\*" OR "serious mental disorder\*" OR "serious mental ill\*":ti,ab OR "persistent mental ill\*" OR "paranoid schizophrenia" OR hebephrenia OR "catatonic schizophrenia" OR "borderline state" OR "bipolar disorder" OR "mood disorder" OR "chronic mental disorder\*" OR "severe mental disorder\*") AND ("shared decision aid\*" OR "decision support tool\*" OR "encounter tool" OR "shared decision mak\*" OR "patient engage\*" OR "patient involv\*" OR "decision coach\*" OR (coordinat\* AND decis\*) OR csc OR "supported decision mak\*" OR "decision making" OR "decision mak\*" OR "decision support system" OR "decision support system" OR (decision\* AND support\*) OR (decision\* AND mak\*)) AND ((severe\* OR serious\* OR first\* OR inital\* OR primar\* OR earl\* OR predict\*) OR "first time episod\*"))

PsycInfo (EbscoHost)

|     |                                                                                                                                                                                                                                                                                                                                                                                                                                                                                                                                                                                                  |
|-----|--------------------------------------------------------------------------------------------------------------------------------------------------------------------------------------------------------------------------------------------------------------------------------------------------------------------------------------------------------------------------------------------------------------------------------------------------------------------------------------------------------------------------------------------------------------------------------------------------|
| S1  | TX ((schizo* OR "early psychos*" OR psychosis OR psychoses* OR psychos* OR psychot* OR "psychotic disorder*" OR "schizophrenia episode*" OR smi OR antipsychotic* OR "major depressive disorder*" OR "borderline personality disorder*" OR "schizoaffective disorder*" OR "severe mental disorder*" OR "serious mental disorder*" OR "serious mental ill*":ti,ab OR "persistent mental ill*" OR "paranoid schizophrenia" OR hebephrenia OR "catatonic schizophrenia" OR "borderline state" OR "bipolar disorder" OR "mood disorder" OR "chronic mental disorder*" OR "severe mental disorder*")) |
| S2  | MM "Schizophrenia" OR MM "Acute Schizophrenia" OR MM "Catatonic Schizophrenia" OR MM "Childhood Schizophrenia" OR MM "Paranoid Schizophrenia" OR MM "Process Schizophrenia" OR MM "Schizophrenia (Disorganized Type)" OR MM "Schizophreniform Disorder" OR MM "Undifferentiated Schizophrenia" OR MM "Schizophrenia (Disorganized Type)" OR MM "Paranoid Schizophrenia" OR MM "Catatonic Schizophrenia"                                                                                                                                                                                          |
| S3  | MM "Borderline Personality Disorder" OR MM "Bipolar Disorder"                                                                                                                                                                                                                                                                                                                                                                                                                                                                                                                                    |
| S4  | MM "Affective Disorders"                                                                                                                                                                                                                                                                                                                                                                                                                                                                                                                                                                         |
| S5  | S2 OR S3 OR S4                                                                                                                                                                                                                                                                                                                                                                                                                                                                                                                                                                                   |
| S6  | TX ("shared decision aid*" OR "decision support tool*" OR "encounter tool" OR "shared decision mak*" OR "patient engage*" OR "patient involv*" OR "decision coach*" OR (coordinat* AND decis*) OR csc OR "supported decision mak*" OR "decision making" OR "decision mak*" OR "decision support system" OR "decision support system" OR (decision* AND support*) OR (decision* AND mak*))                                                                                                                                                                                                        |
| S7  | MM "Decision Support Systems" OR MM "Decision Making"                                                                                                                                                                                                                                                                                                                                                                                                                                                                                                                                            |
| S8  | S6 OR S7                                                                                                                                                                                                                                                                                                                                                                                                                                                                                                                                                                                         |
| S9  | S5 AND S8                                                                                                                                                                                                                                                                                                                                                                                                                                                                                                                                                                                        |
| S10 | TX ((severe* OR serious* OR first* OR inital* OR primar* OR earl* OR predict* OR "first time episod*"))                                                                                                                                                                                                                                                                                                                                                                                                                                                                                          |
| S11 | S9 AND S10                                                                                                                                                                                                                                                                                                                                                                                                                                                                                                                                                                                       |

Applied Social Sciences Index & Abstracts-ASSIA (Proquest)

|     |                                                                                                                                                                                                                                                                                                                                                                                                                                                                                                                                                                                                                                                                                                                                                                                                                                                                                                                                                                                                                                                                                                                                                                                                    |
|-----|----------------------------------------------------------------------------------------------------------------------------------------------------------------------------------------------------------------------------------------------------------------------------------------------------------------------------------------------------------------------------------------------------------------------------------------------------------------------------------------------------------------------------------------------------------------------------------------------------------------------------------------------------------------------------------------------------------------------------------------------------------------------------------------------------------------------------------------------------------------------------------------------------------------------------------------------------------------------------------------------------------------------------------------------------------------------------------------------------------------------------------------------------------------------------------------------------|
| S1  | ti((schizo* OR "early psychos*" OR psychosis OR psychoses* OR psychos* OR psychot* OR "psychotic disorder*" OR "schizophrenia episode*" OR smi OR antipsychotic* OR "major depressive disorder*" OR "borderline personality disorder*" OR "schizoaffective disorder*" OR "severe mental disorder*" OR "serious mental disorder*" OR "serious mental ill*":ti,ab OR "persistent mental ill*" OR "paranoid schizophrenia" OR hebephrenia OR "catatonic schizophrenia" OR "borderline state" OR "bipolar disorder" OR "mood disorder" OR "chronic mental disorder*" OR "severe mental disorder*")) OR ab((schizo* OR "early psychos*" OR psychosis OR psychoses* OR psychos* OR psychot* OR "psychotic disorder*" OR "schizophrenia episode*" OR smi OR antipsychotic* OR "major depressive disorder*" OR "borderline personality disorder*" OR "schizoaffective disorder*" OR "severe mental disorder*" OR "serious mental disorder*" OR "serious mental ill*":ti,ab OR "persistent mental ill*" OR "paranoid schizophrenia" OR hebephrenia OR "catatonic schizophrenia" OR "borderline state" OR "bipolar disorder" OR "mood disorder" OR "chronic mental disorder*" OR "severe mental disorder*")) |
| S2  | Mesh("Schizophrenia" OR "Acute Schizophrenia" OR "Catatonic Schizophrenia" OR "Childhood Schizophrenia" OR "Paranoid Schizophrenia" OR "Process Schizophrenia" OR "Schizophreniform Disorder" OR "Undifferentiated Schizophrenia" OR "Schizophrenia (Disorganized Type)" OR "Paranoid Schizophrenia" OR "Catatonic Schizophrenia")                                                                                                                                                                                                                                                                                                                                                                                                                                                                                                                                                                                                                                                                                                                                                                                                                                                                 |
| S3  | Mesh("Borderline Personality Disorder" OR "Bipolar Disorder")                                                                                                                                                                                                                                                                                                                                                                                                                                                                                                                                                                                                                                                                                                                                                                                                                                                                                                                                                                                                                                                                                                                                      |
| S4  | S1 OR S2 OR S3                                                                                                                                                                                                                                                                                                                                                                                                                                                                                                                                                                                                                                                                                                                                                                                                                                                                                                                                                                                                                                                                                                                                                                                     |
| S5  | ti(("shared decision aid*" OR "decision support tool*" OR "encounter tool" OR "shared decision mak*" OR "patient engage*" OR "patient involv*" OR "decision coach*" OR (coordinat* AND decis*) OR csc OR "supported decision mak*" OR "decision making" OR "decision mak*" OR "decision support system" OR "decision support system" OR (decision* AND support*) OR (decision* AND make*))) OR ab(("shared decision aid*" OR "decision support tool*" OR "encounter tool" OR "shared decision mak*" OR "patient engage*" OR "patient involv*" OR "decision coach*" OR (coordinat* AND decis*) OR csc OR "supported decision mak*" OR "decision making" OR "decision mak*" OR "decision support system" OR "decision support system" OR (decision* AND support*) OR (decision* AND mak*)))                                                                                                                                                                                                                                                                                                                                                                                                          |
| S6  | MESH("decision support techniques")                                                                                                                                                                                                                                                                                                                                                                                                                                                                                                                                                                                                                                                                                                                                                                                                                                                                                                                                                                                                                                                                                                                                                                |
| S7  | S5 OR S6                                                                                                                                                                                                                                                                                                                                                                                                                                                                                                                                                                                                                                                                                                                                                                                                                                                                                                                                                                                                                                                                                                                                                                                           |
| S8  | S4 AND S7                                                                                                                                                                                                                                                                                                                                                                                                                                                                                                                                                                                                                                                                                                                                                                                                                                                                                                                                                                                                                                                                                                                                                                                          |
| S9  | ti(((severe* OR serious* OR first* OR inital* OR primar* OR earl* OR predict*OR "first time episod*")))) OR ab(((severe* OR serious* OR first* OR inital* OR primar* OR earl* OR predict*OR "first time episod*"))))                                                                                                                                                                                                                                                                                                                                                                                                                                                                                                                                                                                                                                                                                                                                                                                                                                                                                                                                                                               |
| S10 | S8 AND S9                                                                                                                                                                                                                                                                                                                                                                                                                                                                                                                                                                                                                                                                                                                                                                                                                                                                                                                                                                                                                                                                                                                                                                                          |
| S11 | (S10) AND la.exact("ENG")                                                                                                                                                                                                                                                                                                                                                                                                                                                                                                                                                                                                                                                                                                                                                                                                                                                                                                                                                                                                                                                                                                                                                                          |

Title: "decision mak\*" OR Title: decision support\* AND Title: psych\* OR Title: schizo\* OR Title: mental\*

File 2. PRISMA Flow Diagram

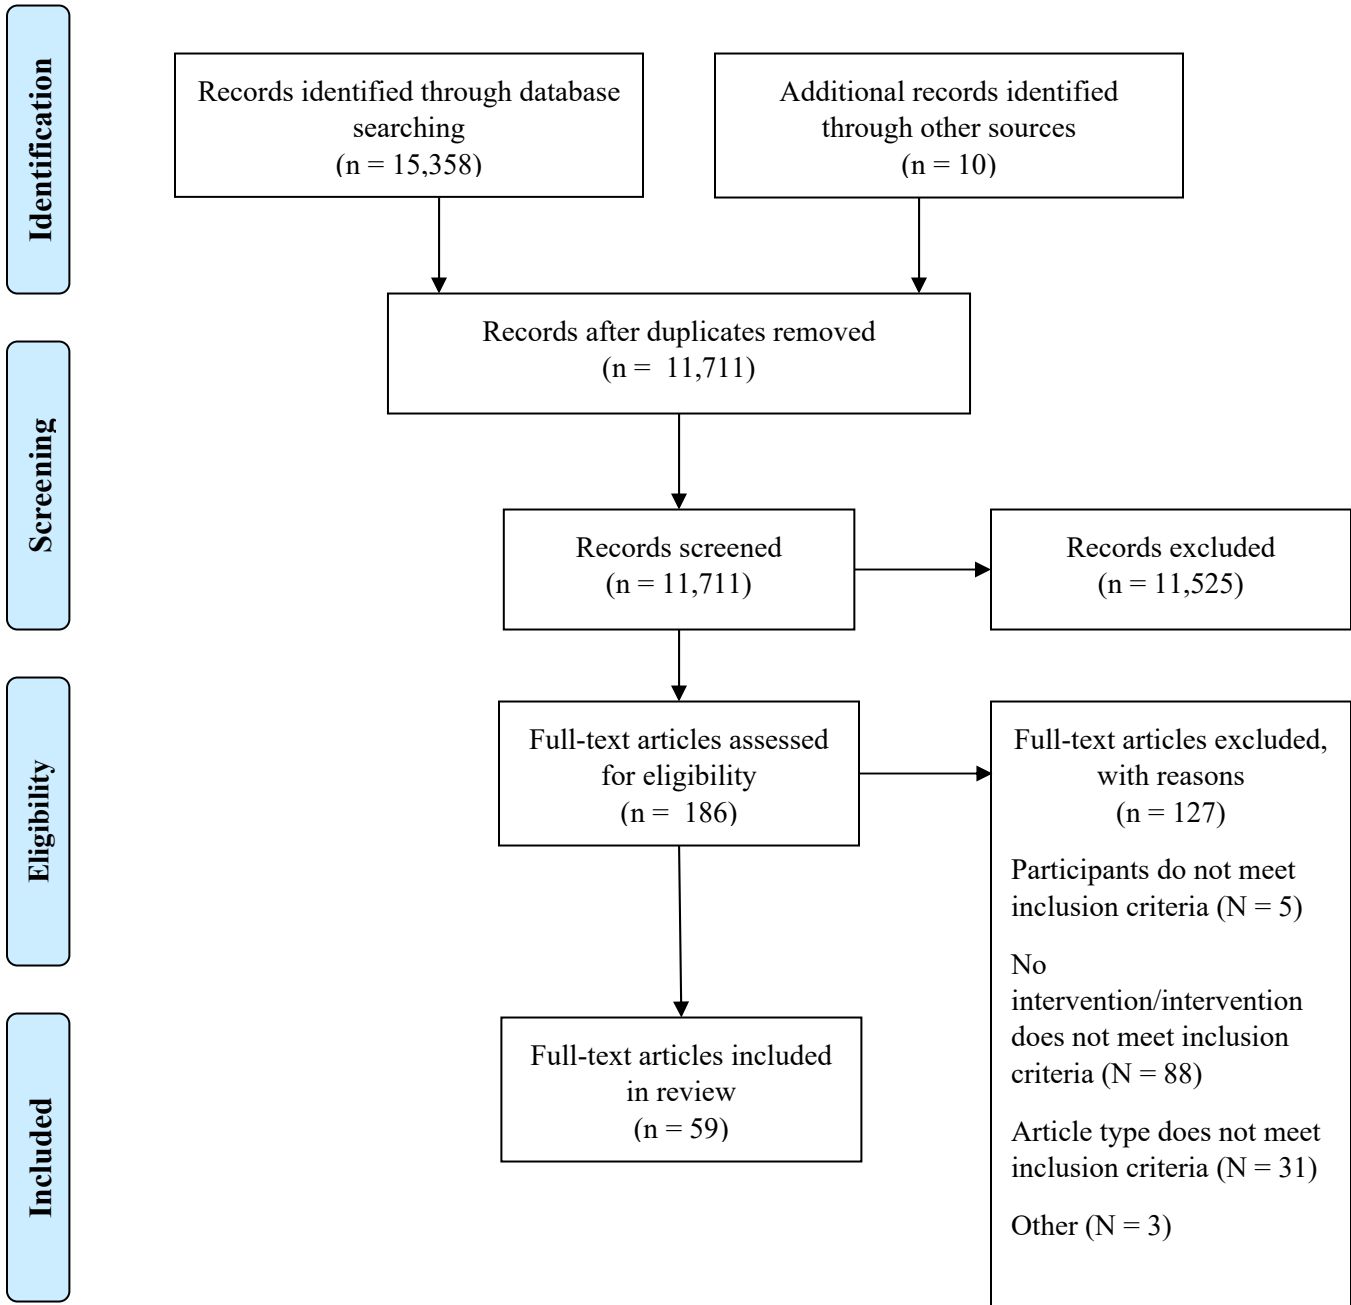

### File 3. Risk of Bias and Quality Assessment

**Table 1. Risk of Bias of Quantitative Records (N=51) Included in Review**

| Study              | Cochrane Risk of Bias Item <sup>a</sup> |    |   |    |    |    |   |
|--------------------|-----------------------------------------|----|---|----|----|----|---|
|                    | 1                                       | 2  | 3 | 4  | 5  | 6  | 7 |
| Aljumah 2015       | 0                                       | 0  | 1 | 0  | 1  | 1  | 0 |
| Anthony 2014       | 1                                       | 1  | 1 | 0  | 0  | 99 | 0 |
| Aoki 2019          | 0                                       | 0  | 1 | 1  | 1  | 0  | 0 |
| Barr 2019          | 1                                       | 1  | 1 | 1  | 1  | 0  | 0 |
| Barrett 2013       | 0                                       | 0  | 0 | 0  | 0  | 99 | 0 |
| Bauer 2006a        | 0                                       | 0  | 0 | 99 | 0  | 0  | 0 |
| Bauer 2006b        | 0                                       | 0  | 0 | 99 | 0  | 0  | 0 |
| Ben-Zeev 2016      | 1                                       | 1  | 1 | 0  | 99 | 99 | 0 |
| Browne 2017        | 1                                       | 0  | 0 | 0  | 0  | 99 | 0 |
| Burn 2019          | 1                                       | 1  | 1 | 0  | 0  | 0  | 0 |
| Campbell 2014      | 0                                       | 99 | 1 | 1  | 0  | 99 | 0 |
| Chen 2018          | 1                                       | 1  | 1 | 0  | 0  | 99 | 0 |
| Deegan 2008        | 1                                       | 1  | 1 | 0  | 0  | 99 | 0 |
| Dixon 2014         | 0                                       | 99 | 1 | 1  | 0  | 99 | 0 |
| Elbogen 2007a      | 99                                      | 99 | 1 | 99 | 0  | 99 | 0 |
| Elbogen 2007b      | 1                                       | 1  | 1 | 1  | 0  | 99 | 0 |
| Finnerty 2018      | 1                                       | 1  | 1 | 0  | 0  | 0  | 0 |
| Finnerty 2019      | 1                                       | 1  | 1 | 0  | 0  | 0  | 0 |
| Gordon 2016        | 1                                       | 1  | 1 | 1  | 1  | 1  | 0 |
| Hamann 2007        | 0                                       | 1  | 1 | 1  | 0  | 99 | 0 |
| Hamann 2011        | 0                                       | 0  | 1 | 1  | 99 | 99 | 1 |
| Hamann 2014        | 0                                       | 0  | 1 | 99 | 0  | 0  | 0 |
| Hamann 2017        | 0                                       | 0  | 1 | 1  | 1  | 0  | 1 |
| Harter 2016        | 0                                       | 1  | 1 | 0  | 0  | 0  | 0 |
| Ishii 2017         | 0                                       | 0  | 1 | 1  | 1  | 0  | 0 |
| Kreyenbuhl<br>2016 | 1                                       | 1  | 1 | 0  | 0  | 99 | 0 |
| Kreyenbuhl<br>2017 | 0                                       | 99 | 0 | 0  | 0  | 99 | 0 |
| Lawn 2007          | 1                                       | 1  | 1 | 1  | 1  | 99 | 0 |
| LeBlanc 2015       | 0                                       | 99 | 0 | 1  | 0  | 0  | 0 |
| Loh 2007           | 0                                       | 0  | 1 | 1  | 1  | 0  | 0 |
| Lovell 2018        | 0                                       | 0  | 1 | 0  | 0  | 0  | 0 |
| Metz 2018          | 0                                       | 0  | 1 | 1  | 0  | 0  | 0 |
| Metz 2019          | 0                                       | 0  | 1 | 0  | 0  | 0  | 0 |

|                      |     |     |     |     |     |     |     |
|----------------------|-----|-----|-----|-----|-----|-----|-----|
| Moncrieff 2016       | 1   | 0   | 1   | 1   | 0   | 0   | 0   |
| Paudel 2018          | 1   | 1   | 1   | 1   | 1   | 0   | 0   |
| Priebe 2007          | 0   | 0   | 1   | 1   | 0   | 99  | 1   |
| Ramon 2017           | 1   | 1   | 1   | 1   | 0   | 99  | 0   |
| Raue 2019            | 0   | 1   | 1   | 1   | 0   | 0   | 0   |
| Robinson 2018        | 1   | 1   | 1   | 1   | 0   | 0   | 0   |
| Salyers 2017         | 1   | 1   | 1   | 1   | 0   | 0   | 0   |
| Sanchez 2019         | 1   | 1   | 1   | 1   | 0   | 0   | 0   |
| Seikkula 2006        | 1   | 1   | 1   | 0   | 0   | 99  | 0   |
| Simmons 2017         | 1   | 1   | 1   | 1   | 99  | 0   | 0   |
| Stein 2013           | 1   | 1   | 1   | 0   | 0   | 0   | 0   |
| Sutherby 1999        | 1   | 1   | 1   | 1   | 0   | 99  | 0   |
| Tasma 2018           | 1   | 1   | 1   | 1   | 0   | 0   | 0   |
| Thornicroft 2013     | 0   | 0   | 1   | 0   | 0   | 0   | 0   |
| Treichler 2018       | 1   | 1   | 1   | 0   | 0   | 0   | 0   |
| van der Krieke 2013  | 0   | 0   | 1   | 99  | 0   | 0   | 0   |
| Woltmann 2011        | 0   | 99  | 1   | 1   | 1   | 99  | 1   |
| Zisman-Ilani 2019    | 1   | 1   | 1   | 1   | 0   | 0   | 0   |
| Percent Low Risk     | 47% | 35% | 12% | 37% | 75% | 57% | 92% |
| Percent High Risk    | 51% | 53% | 88% | 53% | 20% | 4%  | 8%  |
| Percent Unclear Risk | 2%  | 12% | 0%  | 10% | 6%  | 39% | 0%  |

<sup>a</sup>(1) Random sequence generation; (2) Allocation concealment; (3) Blinding of participants and personnel; (4) Blinding of outcome assessment; (5) Incomplete outcome data; (6) Selective reporting; (7) Other bias

0=Low Risk; 1=High Risk; 99=Unclear Risk

**Table 2. Quality Assessment of Qualitative Records (N=20) Included in Review**

| Study               | CASP Item <sup>a</sup> |      |     |     |     |     |     |     |     |     |
|---------------------|------------------------|------|-----|-----|-----|-----|-----|-----|-----|-----|
|                     | 1                      | 2    | 3   | 4   | 5   | 6   | 7   | 8   | 9   | 10  |
| Baker 2019          | 0                      | 0    | 0   | 0   | 0   | 0   | 0   | 0   | 0   | 0   |
| Borschmann 2014     | 0                      | 0    | 0   | 0   | 0   | 0   | 0   | 0   | 0   | 99  |
| Burn 2019           | 0                      | 0    | 0   | 0   | 0   | 99  | 0   | 0   | 0   | 99  |
| Deegan 2008         | 0                      | 0    | 0   | 99  | 0   | 1   | 0   | 99  | 1   | 1   |
| Deegan 2017         | 0                      | 0    | 0   | 0   | 0   | 0   | 0   | 0   | 0   | 99  |
| Elbogen 2007b       | 0                      | 0    | 99  | 0   | 0   | 1   | 0   | 0   | 0   | 0   |
| Farrelly 2014       | 0                      | 0    | 0   | 0   | 0   | 0   | 0   | 0   | 0   | 0   |
| Farrelly 2016       | 0                      | 0    | 0   | 0   | 1   | 1   | 0   | 0   | 0   | 0   |
| Finnerty 2019       | 0                      | 0    | 0   | 0   | 0   | 99  | 0   | 99  | 0   | 0   |
| Gibson 2019         | 0                      | 0    | 0   | 0   | 0   | 0   | 1   | 0   | 0   | 0   |
| Gordon 2016         | 1                      | 0    | 99  | 0   | 99  | 1   | 0   | 99  | 0   | 0   |
| Goscha 2015         | 0                      | 0    | 0   | 0   | 0   | 1   | 99  | 0   | 0   | 0   |
| Lawn 2007           | 0                      | 0    | 0   | 0   | 99  | 1   | 0   | 99  | 0   | 0   |
| Lucksted 2015       | 0                      | 0    | 0   | 0   | 0   | 99  | 0   | 0   | 0   | 0   |
| Moncrieff 2016      | 0                      | 0    | 0   | 0   | 0   | 1   | 0   | 99  | 0   | 0   |
| Ramon 2017          | 0                      | 0    | 0   | 99  | 0   | 0   | 0   | 99  | 0   | 0   |
| Seikkula 2006       | 0                      | 0    | 0   | 0   | 99  | 1   | 0   | 1   | 0   | 1   |
| Tasma 2018          | 0                      | 0    | 0   | 0   | 99  | 99  | 0   | 99  | 99  | 99  |
| Thornicroft 2013    | 0                      | 0    | 99  | 99  | 99  | 1   | 0   | 99  | 0   | 0   |
| van der Krieke 2013 | 0                      | 0    | 0   | 0   | 0   | 1   | 0   | 99  | 0   | 0   |
| Percent Yes         | 95%                    | 100% | 85% | 85% | 70% | 30% | 90% | 50% | 90% | 70% |
| Percent No          | 5%                     | 0%   | 0%  | 0%  | 5%  | 50% | 5%  | 5%  | 5%  | 10% |
| Percent Can't Tell  | 0%                     | 0%   | 15% | 15% | 25% | 20% | 5%  | 45% | 5%  | 20% |

<sup>a</sup>(1) Was there a clear statement of the research; (2) Is a qualitative methodology appropriate; (3) Was the research design appropriate to address the aims of the research; (4) Was the recruitment strategy appropriate to the aims of the research; (5) Was the data collected in a way that addressed the research issue; (6) Has the relationship between researcher and participants been adequately considered; (7) Have ethical issues been taken into consideration; (8) Was the data analysis sufficiently rigorous; (9) Is there a clear statement of findings; (10) Will the results help locally

0=Yes; 1=No; 99=Can't Tell
